# Supplementary material for: Interaction effects of type 2 diabetes mellitus and air pollutants on white matter structures and cognitive function
Source: Research Square preprint supplement (doi:10.21203/rs.3.rs-6970716/v1), 2025-07-14
Supplement: Supplementary file 1 [file ea663c2454105a836ba0fa4a.xlsx]

## Sheet: Table S1
Table S1. The Cognitive Information
Cognitive test		T2DM (N = 665)			Healthy control (N = 13382)			Z	P
Category	Note	Missing	Mean	IQR	Missing	Mean	IQR
Reaction time	Mean time to correctly identify matches	61	620.139	128.25	946	602.366	129	13.025	＜0.0001
Numeric memory	Maximum digits remembered correctly	221	6.34234	1	4057	6.62113	2	-1.064	0.291021
	Number of rounds of numeric memory test performed	221	7.8964	2	4057	8.14595	2	-1.052	0.291456
Fluid intelligence / reasoning	Fluid intelligence score	71	6.43771	3	1114	6.58559	3	-0.543	0.586117
Trail making	Duration to complete numeric path	236	251.333	91	4257	230.081	75	28.872	＜0.0001
	Duration to complete alphanumeric path	236	600.21	297	4257	567.609	248	22.228	＜0.0001
	Total errors traversing numeric path	236	1.64802	1	4257	1.35901	1	5.774	＜0.0001
	Total errors traversing alphanumeric path	236	2.26573	2	4257	2.19321	2	0.539	0.594846
Matrix pattern completion	Number of puzzles correctly solved	244	7.61045	3	4372	7.85805	3	-1.623	0.105005
	Number of puzzles viewed	244	13.7791	2	4372	13.6852	2	0.356	0.721396
Symbol digit substitution	Number of symbol digit matches attempted	243	18.0071	6	4362	19.1531	7	-5.433	＜0.0001
	Number of symbol digit matches made correctly	243	16.9005	7	4362	18.3344	7	-6.271	＜0.0001
Tower rearranging	Number of puzzles correct	248	9.58034	5	4472	9.70135	4	-0.894	0.369545
	Number of puzzles attempted	236	12.9953	4	4257	12.9862	4	0.092	0.925997
Paired associate learning	Number of word pairs correctly associated	236	6.12587	4	4257	6.78762	4	-4.671	＜0.0001

## Sheet: Table S2
Table S2. The Imaging Information
Fibers	T2DM (N = 665)															Healthy control (N = 13382)
	FA			MD			ICVF			ISOVF			OD			FA			MD			ICVF			ISOVF			OD
	Missing	Mean	SD	Missing	Mean	SD	Missing	Mean	SD	Missing	Mean	SD	Missing	Mean	SD	Missing	Mean	SD	Missing	Mean	SD	Missing	Mean	SD	Missing	Mean	SD	Missing	Mean	SD
Anterior corona radiata (left)	50	0.437732	0.0323172	50	0.000793945	5.26834e-05	50	0.534693	0.0528952	50	0.0578797	0.0169376	50	0.185736	0.0206285	706	0.449448	0.031304	706	0.000779081	4.52215e-05	706	0.548808	0.0466581	706	0.0560879	0.0155209	706	0.182246	0.0191634
Anterior corona radiata (right)	50	0.447427	0.0327198	50	0.000787639	5.07281e-05	50	0.539953	0.0519167	50	0.0560515	0.0181675	50	0.177342	0.0207126	706	0.457576	0.0317085	706	0.000772238	4.38029e-05	706	0.554516	0.0464346	706	0.0541091	0.0150098	706	0.175972	0.0191192
Anterior limb of internal capsule (left)	50	0.58654	0.0273179	50	0.000730156	4.33446e-05	50	0.644426	0.0373666	50	0.0735761	0.0228358	50	0.110648	0.0209348	706	0.58942	0.0258661	706	0.000724301	3.91626e-05	706	0.64971	0.0333377	706	0.0716932	0.0216865	706	0.108322	0.0154788
Anterior limb of internal capsule (right)	50	0.596842	0.027454	50	0.000737759	4.25554e-05	50	0.648186	0.0361664	50	0.0795841	0.0248366	50	0.101569	0.0189756	706	0.59915	0.026115	706	0.000728886	3.86395e-05	706	0.655754	0.0328492	706	0.0770997	0.0231722	706	0.100329	0.0145994
Body of corpus callosum	50	0.700918	0.0321496	50	0.000811795	4.4899e-05	50	0.657547	0.0364356	50	0.117695	0.0224023	50	0.0648346	0.016552	706	0.711341	0.0296577	706	0.000797574	3.97731e-05	706	0.660231	0.0337207	706	0.109935	0.0207251	706	0.062266	0.0134564
Cerebral peduncle (left)	50	0.705008	0.0227818	50	0.000715317	3.35355e-05	50	0.755157	0.0321159	50	0.106533	0.0194585	50	0.110392	0.0179163	706	0.710722	0.023227	706	0.000713719	2.99627e-05	706	0.750145	0.0302064	706	0.102571	0.0192954	706	0.107202	0.0152377
Cerebral peduncle (right)	50	0.701776	0.0238585	50	0.000722706	3.54749e-05	50	0.744208	0.0332996	50	0.106469	0.0219416	50	0.106079	0.0210038	706	0.706832	0.0237103	706	0.000722331	3.10132e-05	706	0.738155	0.0308276	706	0.102984	0.0205985	706	0.102714	0.0153386
Cingulum cingulate gyrus (left)	50	0.613457	0.0347173	50	0.000766046	3.11124e-05	50	0.599617	0.0424176	50	0.0669546	0.0179754	50	0.0801897	0.020885	706	0.620218	0.0324386	706	0.000762418	2.96706e-05	706	0.609433	0.0385299	706	0.0688412	0.0185824	706	0.0777209	0.0153975
Cingulum cingulate gyrus (right)	50	0.571553	0.0360704	50	0.000765436	3.02892e-05	50	0.57743	0.0425981	50	0.058352	0.0169531	50	0.0942892	0.0241695	706	0.578742	0.0337117	706	0.000762108	2.93707e-05	706	0.586199	0.0377559	706	0.0600615	0.0175277	706	0.0902154	0.0184003
Cingulum hippocampus (left)	50	0.459778	0.0358015	50	0.000758385	4.00729e-05	50	0.499086	0.0374808	50	0.0382524	0.0183107	50	0.182197	0.0315917	706	0.46047	0.0352762	706	0.000757365	3.70552e-05	706	0.498105	0.0326298	706	0.0336486	0.0168115	706	0.177063	0.0296093
Cingulum hippocampus (right)	50	0.460178	0.0352173	50	0.000757833	3.64411e-05	50	0.499766	0.038851	50	0.0340831	0.0141528	50	0.178391	0.0302893	706	0.458201	0.0358453	706	0.000760863	3.53557e-05	706	0.497861	0.0338933	706	0.0315709	0.0152125	706	0.174799	0.0286346
Corticospinal tract (left)	50	0.537164	0.0347078	50	0.000782289	6.78378e-05	50	0.710967	0.0422242	50	0.148063	0.0463359	50	0.14402	0.0299713	706	0.536789	0.0345582	706	0.000788847	7.15514e-05	706	0.707495	0.0442136	706	0.151707	0.0496523	706	0.147343	0.0290128
Corticospinal tract (right)	50	0.519488	0.0366779	50	0.00077612	6.95088e-05	50	0.714903	0.0432872	50	0.148048	0.0475931	50	0.155791	0.0336661	706	0.516313	0.0379453	706	0.000791727	7.9959e-05	706	0.712201	0.0454026	706	0.157964	0.0552693	706	0.158616	0.0327688
External capsule (left)	50	0.458438	0.0270566	50	0.000768498	4.47983e-05	50	0.503755	0.0334535	50	0.033218	0.0172076	50	0.173466	0.0200957	706	0.464554	0.0253316	706	0.000758668	3.90688e-05	706	0.512165	0.0298749	706	0.0308947	0.0150193	706	0.171896	0.0175459
External capsule (right)	50	0.450009	0.025326	50	0.000781325	4.36922e-05	50	0.501076	0.0340028	50	0.0361552	0.0187599	50	0.174987	0.0189099	706	0.45579	0.0236279	706	0.00077168	3.87229e-05	706	0.509062	0.0296856	706	0.0341109	0.0165802	706	0.173382	0.0159593
Fornix cres+stria terminalis (left)	50	0.501008	0.0385587	50	0.00086387	7.38739e-05	50	0.574335	0.0392353	50	0.13414	0.0503792	50	0.151765	0.0276488	706	0.520325	0.0367009	706	0.000841315	6.04098e-05	706	0.575873	0.0346003	706	0.117488	0.0420612	706	0.141603	0.025234
Fornix cres+stria terminalis (right)	50	0.502613	0.0376339	50	0.000889875	7.64779e-05	50	0.573271	0.0405483	50	0.152005	0.0516521	50	0.146981	0.0284488	706	0.518663	0.0351947	706	0.000865829	6.19477e-05	706	0.573696	0.0353535	706	0.134139	0.0431948	706	0.138257	0.0239508
Fornix	50	0.376175	0.0848905	50	0.00175692	0.000330887	50	0.527511	0.082083	50	0.615253	0.135064	50	0.209712	0.183254	706	0.421594	0.0882784	706	0.00162216	0.000321814	706	0.553793	0.0715077	706	0.552659	0.138937	706	0.171727	0.158328
Genu of corpus callosum	50	0.704176	0.0418744	50	0.000798621	5.93692e-05	50	0.608682	0.0469438	50	0.0866914	0.0295899	50	0.0622749	0.0167355	706	0.71933	0.0353494	706	0.000777908	4.84616e-05	706	0.618209	0.0413093	706	0.0762384	0.0251546	706	0.0611299	0.0124945
Inferior cerebellar peduncle (left)	50	0.538609	0.0320473	50	0.00074147	3.46375e-05	50	0.672682	0.0311828	50	0.0971724	0.0249601	50	0.163597	0.0240843	706	0.54496	0.0322569	706	0.000737653	3.37316e-05	706	0.670491	0.0292104	706	0.0932958	0.0235541	706	0.160158	0.0240202
Inferior cerebellar peduncle (right)	50	0.54214	0.0316634	50	0.000725179	2.92892e-05	50	0.674841	0.0320004	50	0.0861022	0.0210251	50	0.165193	0.0253165	706	0.548058	0.0317074	706	0.000725606	3.00628e-05	706	0.673478	0.0291373	706	0.0855437	0.0202793	706	0.160152	0.0247905
Medial lemniscus (left)	50	0.58373	0.0285917	50	0.000757031	5.09765e-05	50	0.625471	0.0333959	50	0.0800175	0.035754	50	0.111311	0.017415	706	0.588455	0.029169	706	0.000759448	5.22722e-05	706	0.622196	0.0315172	706	0.0799398	0.0361511	706	0.107361	0.017292
Medial lemniscus (right)	50	0.590855	0.0293018	50	0.00074994	5.09444e-05	50	0.622004	0.032354	50	0.0727088	0.0327771	50	0.108703	0.0192092	706	0.595418	0.0288722	706	0.000753674	4.91759e-05	706	0.619033	0.030389	706	0.0739001	0.0325054	706	0.104438	0.0169886
Middle cerebellar peduncle	50	0.542175	0.0220188	50	0.000705467	3.0538e-05	50	0.750067	0.0278329	50	0.104419	0.0175648	50	0.199982	0.0162874	706	0.541967	0.0233483	706	0.000706748	3.25458e-05	706	0.751441	0.0264941	706	0.105979	0.0193881	706	0.199577	0.0163261
Pontine crossing tract	50	0.404843	0.0335048	50	0.000779678	7.46637e-05	50	0.689592	0.0427327	50	0.146593	0.0545932	50	0.224213	0.0365361	706	0.405726	0.0330043	706	0.000799493	8.47394e-05	706	0.692664	0.0430608	706	0.162401	0.0620841	706	0.218228	0.0354054
Posterior corona radiata (left)	50	0.475485	0.02702	50	0.000827104	5.99343e-05	50	0.540246	0.0510393	50	0.0848206	0.0201645	50	0.149717	0.0193951	706	0.479285	0.0256883	706	0.000814194	5.45115e-05	706	0.551518	0.0472722	706	0.0833912	0.019362	706	0.151728	0.0173853
Posterior corona radiata (right)	50	0.487606	0.0299815	50	0.000848701	6.60897e-05	50	0.52618	0.0548124	50	0.090548	0.0219237	50	0.133143	0.0204558	706	0.490426	0.0279366	706	0.000833871	6.04444e-05	706	0.538271	0.0495294	706	0.0886105	0.0222172	706	0.1365	0.0190888
Posterior limb of internal capsule (left)	50	0.689932	0.0248489	50	0.000705239	2.5132e-05	50	0.724389	0.0277257	50	0.0819276	0.0162701	50	0.0987861	0.01696	706	0.687612	0.0246447	706	0.000701288	2.45233e-05	706	0.730682	0.025431	706	0.0823516	0.016263	706	0.101637	0.0155699
Posterior limb of internal capsule (right)	50	0.683906	0.0252413	50	0.000717371	2.64971e-05	50	0.7098	0.0288593	50	0.0829219	0.017977	50	0.0934556	0.019327	706	0.680269	0.0247366	706	0.000714602	2.50501e-05	706	0.715009	0.0256304	706	0.084136	0.0180839	706	0.0967018	0.0150963
Posterior thalamic radiation (left)	50	0.587251	0.0375999	50	0.000850385	5.63117e-05	50	0.521978	0.0450268	50	0.0783944	0.0199811	50	0.0806092	0.0138764	706	0.600613	0.0355328	706	0.000843124	5.29557e-05	706	0.531628	0.0439031	706	0.0789094	0.0191387	706	0.0763382	0.0115408
Posterior thalamic radiation (right)	50	0.576692	0.0357782	50	0.00085006	5.14465e-05	50	0.532852	0.0447488	50	0.0898899	0.0188053	50	0.0873066	0.0150676	706	0.590994	0.0341698	706	0.000843237	4.79636e-05	706	0.542455	0.0438932	706	0.0908334	0.0186532	706	0.0822908	0.012261
Retrolenticular part of internal capsule (left)	50	0.608844	0.0265573	50	0.000772288	3.42835e-05	50	0.601334	0.0356758	50	0.073733	0.0177828	50	0.0985033	0.0146973	706	0.613578	0.0270367	706	0.00076735	3.33128e-05	706	0.609173	0.0344405	706	0.0739707	0.0185086	706	0.0969607	0.0140571
Retrolenticular part of internal capsule (right)	50	0.592054	0.02889	50	0.000778805	4.06513e-05	50	0.590231	0.0399632	50	0.074028	0.0204049	50	0.105727	0.0173912	706	0.593663	0.0282457	706	0.000776374	3.69125e-05	706	0.597415	0.0360972	706	0.075906	0.0209251	706	0.104493	0.0161728
Sagittal stratum (left)	50	0.552945	0.0321418	50	0.000806519	4.23264e-05	50	0.52177	0.040266	50	0.0535265	0.0171853	50	0.106289	0.0161792	706	0.564934	0.0316572	706	0.000797472	3.97025e-05	706	0.534555	0.0403493	706	0.053381	0.0162144	706	0.103058	0.0155385
Sagittal stratum (right)	50	0.549293	0.031274	50	0.00082386	4.29742e-05	50	0.52131	0.0432425	50	0.0674314	0.0182488	50	0.104109	0.0158623	706	0.559193	0.0304294	706	0.000818033	4.15482e-05	706	0.530301	0.0430086	706	0.0679674	0.0178515	706	0.0998485	0.0140789
Splenium of corpus callosum	50	0.785344	0.0244551	50	0.000748522	3.84363e-05	50	0.692584	0.0360446	50	0.0825497	0.0175353	50	0.0518541	0.0145362	706	0.788348	0.0222799	706	0.000740017	3.30718e-05	706	0.701676	0.0326375	706	0.0815707	0.0161101	706	0.0530143	0.0108258
Superior cerebellar peduncle (left)	50	0.700695	0.0259933	50	0.000802228	4.02688e-05	50	0.69623	0.0250553	50	0.130765	0.024234	50	0.0811283	0.0088123	706	0.70859	0.0262092	706	0.000794536	3.79855e-05	706	0.698423	0.0235549	706	0.126234	0.022695	706	0.0795724	0.0113373
Superior cerebellar peduncle (right)	50	0.689797	0.0263266	50	0.000810455	3.97374e-05	50	0.697521	0.0261209	50	0.138886	0.024522	50	0.0828335	0.0101067	706	0.698319	0.0258	706	0.000803374	3.8546e-05	706	0.698652	0.0242152	706	0.133763	0.0236415	706	0.0812099	0.0115192
Superior corona radiata (left)	50	0.485283	0.0275052	50	0.00075053	4.42418e-05	50	0.626657	0.0450153	50	0.0838822	0.0166626	50	0.178073	0.024386	706	0.4888	0.0252691	706	0.000737794	3.68979e-05	706	0.640342	0.0392081	706	0.0824781	0.015894	706	0.182451	0.0209546
Superior corona radiata (right)	50	0.478313	0.0269591	50	0.00074714	4.20639e-05	50	0.636453	0.0441811	50	0.0885267	0.0159528	50	0.183186	0.0245466	706	0.481559	0.0252977	706	0.000735803	3.63979e-05	706	0.649591	0.0384576	706	0.0876511	0.0165187	706	0.187238	0.0208572
Superior fronto-occipital fasciculus (left)	50	0.439733	0.0512114	50	0.000806748	0.000126777	50	0.572871	0.0811678	50	0.0881398	0.0462181	50	0.187269	0.034623	706	0.457502	0.0466508	706	0.000766388	9.67724e-05	706	0.604871	0.0670033	706	0.0805553	0.0372498	706	0.184917	0.0303886
Superior fronto-occipital fasciculus (right)	50	0.439085	0.0480878	50	0.000792722	0.000103379	50	0.570718	0.0741173	50	0.0789132	0.035847	50	0.182102	0.0348715	706	0.455649	0.0445253	706	0.000758801	7.66481e-05	706	0.600968	0.0592584	706	0.0739048	0.0323998	706	0.181583	0.0314058
Superior longitudinal fasciculus (left)	50	0.523104	0.0264315	50	0.000732169	3.51469e-05	50	0.643259	0.0420209	50	0.0741705	0.014403	50	0.143035	0.0165723	706	0.527247	0.0269863	706	0.000726591	3.29117e-05	706	0.652853	0.0396764	706	0.0749541	0.0140287	706	0.142856	0.0169249
Superior longitudinal fasciculus (right)	50	0.51604	0.027689	50	0.000751117	3.73692e-05	50	0.632019	0.0433079	50	0.0835332	0.0156064	50	0.140222	0.0172491	706	0.519564	0.0268773	706	0.000745291	3.49454e-05	706	0.6399	0.0399068	706	0.0834471	0.0160211	706	0.140211	0.0165879
Tapetum (left)	50	0.565376	0.0736498	50	0.00100114	0.000154446	50	0.499244	0.073456	50	0.166111	0.090217	50	0.0624771	0.0216939	706	0.576029	0.0677869	706	0.000972522	0.000141998	706	0.517008	0.0667388	706	0.158221	0.0843145	706	0.065838	0.023414
Tapetum (right)	50	0.530281	0.0754693	50	0.00108568	0.000156912	50	0.460141	0.073014	50	0.200509	0.0845027	50	0.0685914	0.0188572	706	0.543976	0.069093	706	0.001053	0.000144236	706	0.47617	0.0687963	706	0.18945	0.0797622	706	0.0698287	0.0200393
Uncinate fasciculus (left)	50	0.506476	0.0390699	50	0.000737063	3.96126e-05	50	0.500152	0.0327463	50	0.0216733	0.0136924	50	0.147304	0.0256466	706	0.510306	0.0393138	706	0.000733548	3.88204e-05	706	0.506464	0.0325902	706	0.0205873	0.0151215	706	0.144898	0.0245438
Uncinate fasciculus (right)	50	0.521159	0.0384921	50	0.000758699	4.18288e-05	50	0.496905	0.0363233	50	0.0200796	0.0161775	50	0.120434	0.0247691	706	0.524746	0.0376851	706	0.000751481	3.24542e-05	706	0.50407	0.0313527	706	0.0185799	0.0138161	706	0.118733	0.0235754

## Sheet: Table S3
Table S3. The Main Effects of T2DM
Fibers	FA		MD		ICVF		ISOVF		OD
	β	P	β	P	β	P	β	P	β	P
Anterior corona radiata (left)	-0.252047	2.253E-11*	0.213996	1.305E-08*	-0.20851	1.799E-08*	0.0385822	0.334613	0.12945	4.046E-04*
Anterior corona radiata (right)	-0.215766	2.218E-08*	0.241108	1.017E-10*	-0.219588	3.210E-09*	0.0528161	0.183495	0.0438532	0.250042
Anterior limb of internal capsule (left)	-0.0977253	0.0134878	0.0666555	0.0741209	-0.0805985	0.0315648	0.0501359	0.193787	0.155091	1.413E-07*
Anterior limb of internal capsule (right)	-0.0658119	0.0996273	0.118402	0.00143264	-0.141082	1.526E-04*	0.0435347	0.27069	0.0947786	0.00111234
Body of corpus callosum	-0.281833	1.051E-12*	0.235504	4.755E-10*	-0.0671539	0.0912839	0.246489	1.066E-10*	0.1472	6.388E-11*
Cerebral peduncle (left)	-0.203551	2.137E-07*	0.0483193	0.227086	0.110385	0.00560954	0.155913	1.340E-04*	0.152233	1.349E-07*
Cerebral peduncle (right)	-0.214631	5.955E-08*	0.0206601	0.602672	0.113687	0.00372776	0.124067	0.00231181	0.164967	1.514E-08*
Cingulum cingulate gyrus (left)	-0.203438	3.157E-07*	0.102745	0.0107461	-0.225076	2.510E-09*	-0.0947546	0.0216288	0.123543	6.508E-06*
Cingulum cingulate gyrus (right)	-0.19939	6.139E-07*	0.0930482	0.0206128	-0.204733	4.426E-08*	-0.0949878	0.02104	0.164966	1.466E-07*
Cingulum hippocampus (left)	-0.0180765	0.653373	-0.0132338	0.732107	0.0172969	0.637256	0.150123	1.734E-05*	0.116963	0.00257268
Cingulum hippocampus (right)	0.0341915	0.396173	-0.0837847	0.0335484	0.0325777	0.37682	0.099322	0.00548271	0.0869396	0.0254135
Corticospinal tract (left)	-0.0301915	0.452623	-0.0613768	0.138322	-0.00895345	0.824135	-0.0738151	0.075643	-0.0883824	0.0214524
Corticospinal tract (right)	0.00896161	0.819805	-0.14648	3.453E-04*	-0.0357719	0.374761	-0.160807	1.014E-04*	-0.046894	0.22317
External capsule (left)	-0.177671	5.986E-06*	0.165446	9.186E-06*	-0.21707	8.158E-10*	0.0679016	0.0558347	0.0266017	0.449513
External capsule (right)	-0.170852	1.126E-05*	0.149685	4.654E-05*	-0.203738	8.860E-09*	0.0504092	0.153169	0.0376556	0.276919
Fornix cres+stria terminalis (left)	-0.365875	7.276E-24*	0.236046	3.962E-11*	-0.030256	0.427551	0.254159	7.590E-12*	0.277148	1.571E-14*
Fornix cres+stria terminalis (right)	-0.315058	8.313E-18*	0.252824	2.492E-12*	-0.0119542	0.756333	0.270044	6.030E-13*	0.24159	5.477E-12*
Fornix	-0.328682	4.758E-20*	0.234094	1.097E-10*	-0.323432	4.207E-16*	0.244668	3.045E-12*	0.120586	0.00224732
Genu of corpus callosum	-0.323009	2.536E-17*	0.281332	4.911E-14*	-0.176197	5.322E-06*	0.276708	3.235E-13*	0.089091	8.724E-06*
Inferior cerebellar peduncle (left)	-0.152693	1.043E-04*	0.0690522	0.0547014	0.0108337	0.781189	0.0948239	0.0121826	0.0783575	0.0336312
Inferior cerebellar peduncle (right)	-0.126251	0.00118327	-0.0185563	0.616847	-0.0302613	0.434	-0.0200203	0.60465	0.107413	0.00267063
Medial lemniscus (left)	-0.163384	2.596E-05*	-0.0436807	0.235254	0.00517952	0.891337	-0.0236626	0.535297	0.177342	1.661E-07*
Medial lemniscus (right)	-0.167677	1.295E-05*	-0.0605113	0.0985591	-0.0154037	0.679071	-0.0605622	0.106444	0.15945	1.152E-06*
Middle cerebellar peduncle	-0.00819095	0.835078	-0.0142174	0.715823	-0.0724811	0.0712627	-0.0659939	0.0963066	0.0154003	0.683981
Pontine crossing tract	-0.0172319	0.675147	-0.168341	3.401E-05*	-0.115096	0.00438717	-0.207664	4.617E-07*	0.0716614	0.0697891
Posterior corona radiata (left)	-0.0984598	0.0157691	0.118292	0.00129659	-0.119147	0.00211892	0.0196779	0.609137	-0.0149584	0.696985
Posterior corona radiata (right)	-0.0671168	0.101793	0.103845	0.00468337	-0.132102	5.710E-04*	0.00545639	0.885205	-0.0572616	0.108691
Posterior limb of internal capsule (left)	0.0743237	0.0650279	0.0717671	0.0507044	-0.20575	8.233E-08*	-0.0720499	0.0662762	-0.144925	3.308E-06*
Posterior limb of internal capsule (right)	0.109152	0.00747564	0.0617314	0.0944902	-0.166835	1.241E-05*	-0.082552	0.0422969	-0.178401	4.387E-09*
Posterior thalamic radiation (left)	-0.247525	1.977E-10*	0.0260415	0.499079	-0.106028	0.00709013	-0.0854623	0.0273694	0.333561	2.788E-18*
Posterior thalamic radiation (right)	-0.288964	1.088E-13*	0.030263	0.439922	-0.11294	0.0042915	-0.0881243	0.0256617	0.346437	1.305E-19*
Retrolenticular part of internal capsule (left)	-0.145626	3.342E-04*	0.0795937	0.0464171	-0.163298	3.226E-05*	-0.0534004	0.186723	0.0992032	0.00443523
Retrolenticular part of internal capsule (right)	-0.0814251	0.0465167	0.0256457	0.516399	-0.148608	1.293E-04*	-0.0707984	0.073977	0.0839145	0.0162577
Sagittal stratum (left)	-0.287609	8.599E-13*	0.116272	0.00295988	-0.208061	1.378E-07*	-0.0295229	0.462395	0.179743	1.563E-06*
Sagittal stratum (right)	-0.246533	8.477E-10*	0.0681221	0.0874638	-0.113799	0.00398446	-0.033557	0.388126	0.241224	3.058E-10*
Splenium of corpus callosum	-0.104384	0.00931937	0.137618	2.736E-04*	-0.189931	9.996E-07*	-0.00708726	0.857839	-0.0398736	0.112385
Superior cerebellar peduncle (left)	-0.350357	3.261E-20*	0.178921	5.205E-06*	-0.165229	1.571E-05*	0.160451	6.021E-05*	0.209536	1.523E-14*
Superior cerebellar peduncle (right)	-0.364406	8.765E-22*	0.163873	3.794E-05*	-0.141577	1.732E-04*	0.16959	2.335E-05*	0.205171	6.698E-15*
Superior corona radiata (left)	-0.0724349	0.0715425	0.18295	6.810E-07*	-0.220636	4.937E-09*	0.0202336	0.602093	-0.147481	1.099E-04*
Superior corona radiata (right)	-0.0650823	0.107648	0.185646	4.050E-07*	-0.222746	3.413E-09*	-0.00210431	0.957155	-0.144637	1.552E-04*
Superior fronto-occipital fasciculus (left)	-0.291397	7.738E-14*	0.253267	2.956E-12*	-0.322973	2.180E-18*	0.0970288	0.00945245	0.0952995	0.0149522
Superior fronto-occipital fasciculus (right)	-0.296412	6.369E-14*	0.270149	3.209E-14*	-0.365301	8.084E-24*	0.0640585	0.0996014	0.0436127	0.271196
Superior longitudinal fasciculus (left)	-0.0994072	0.0142764	0.0870809	0.024237	-0.144489	2.244E-04*	-0.0749231	0.060309	0.0251315	0.517988
Superior longitudinal fasciculus (right)	-0.100055	0.0134807	0.0868376	0.0249719	-0.130727	0.000885191	-0.0337898	0.378055	0.0270699	0.468105
Tapetum (left)	-0.0844691	0.0383972	0.136178	5.564E-04*	-0.138363	3.837E-04*	0.0813408	0.0427016	-0.0691079	0.0688519
Tapetum (right)	-0.0827952	0.0370714	0.125218	0.00125909	-0.101268	0.00854428	0.0853689	0.0319759	-0.0224113	0.53796
Uncinate fasciculus (left)	-0.103257	0.0116565	0.0507499	0.202669	-0.141598	1.517E-04*	0.0329875	0.359485	0.0992084	0.0106589
Uncinate fasciculus (right)	-0.118884	0.00367907	0.120844	0.002024	-0.181734	1.892E-06*	0.00465206	0.900198	0.100336	0.0103701
Note: * Representative results can be corrected by multiple comparisons

## Sheet: Table S4
Table S4. The Interaction Effects between T2DM and NO2
Fibers	FA		MD		ICVF		ISOVF		OD
	β	P	β	P	β	P	β	P	β	P
Anterior corona radiata (left)	-0.0322791	0.407892	0.0150374	0.699526	-0.0200499	0.600642	0.0308156	0.456979	0.0240741	0.52471
Anterior corona radiata (right)	-0.0132914	0.739221	0.00905633	0.814428	-0.0195113	0.610923	0.0136776	0.739462	-0.0029759	0.939872
Anterior limb of internal capsule (left)	-0.0479082	0.24223	0.0372881	0.334699	-0.016608	0.668545	0.0578369	0.147927	0.000721801	0.981071
Anterior limb of internal capsule (right)	-0.0336196	0.416635	0.0544035	0.157251	-0.00779201	0.839797	0.0808322	0.0484439	-0.00510753	0.864788
Body of corpus callosum	-0.0449668	0.272118	0.107121	0.00620168	-0.00473691	0.908403	0.131722	0.000857485	-0.00492996	0.83183
Cerebral peduncle (left)	-0.0189198	0.641402	-0.0167842	0.685226	-0.0352956	0.392344	-0.00971177	0.818391	0.0183462	0.538227
Cerebral peduncle (right)	-0.0384031	0.348982	0.0485422	0.237554	0.000525022	0.989677	0.0610892	0.147585	-0.00617308	0.837513
Cingulum cingulate gyrus (left)	-0.000140346	0.997282	0.101316	0.0151102	-0.0408915	0.295015	0.0644351	0.131664	-0.0395588	0.161445
Cingulum cingulate gyrus (right)	-0.0245004	0.554173	0.119148	0.00420294	-0.0666897	0.0847497	0.0546484	0.200136	-0.00643847	0.842372
Cingulum hippocampus (left)	0.0534648	0.199938	-0.0604243	0.13119	0.0107488	0.777108	-0.0144915	0.688397	-0.00965438	0.809954
Cingulum hippocampus (right)	0.00200946	0.961628	0.00932702	0.819338	0.0284749	0.455438	0.0600934	0.104523	0.0208578	0.604417
Corticospinal tract (left)	-0.0117385	0.778191	0.011187	0.794341	-0.0167887	0.687445	0.000513595	0.990482	0.0110058	0.782141
Corticospinal tract (right)	-0.0116275	0.775558	-0.0306105	0.470349	-0.0138658	0.739796	-0.0360568	0.400037	0.0200677	0.61468
External capsule (left)	0.0108532	0.789456	-0.00953181	0.80501	0.00146036	0.96812	0.0105619	0.773571	0.00256941	0.943612
External capsule (right)	-0.0220002	0.585063	0.0307991	0.41781	0.0032156	0.930043	0.0402551	0.270064	0.0177111	0.621588
Fornix cres+stria terminalis (left)	-0.0329467	0.380229	0.0024484	0.947114	-0.00748406	0.849578	0.00915501	0.81155	0.0242255	0.516344
Fornix cres+stria terminalis (right)	-0.0361118	0.34073	0.0489216	0.189458	-0.0169843	0.670061	0.0402516	0.29955	-0.0149542	0.679558
Fornix	-0.0149082	0.687442	0.0136084	0.716895	-0.0158332	0.700256	0.0113708	0.75402	-0.0138315	0.735104
Genu of corpus callosum	-0.0853142	0.0305193	0.0943368	0.0145654	-0.0225871	0.572826	0.120729	0.00211771	0.0197236	0.339471
Inferior cerebellar peduncle (left)	-0.116102	0.00438446	0.070733	0.0572612	-0.00201466	0.960217	0.0910367	0.0201544	0.0996079	0.00895779
Inferior cerebellar peduncle (right)	-0.0873126	0.030241	0.0668519	0.0817638	-0.00170153	0.966115	0.0753756	0.0599715	0.0610657	0.099094
Medial lemniscus (left)	-0.0605773	0.131894	0.0804675	0.0351011	0.00667385	0.864997	0.101571	0.0101278	0.0099692	0.775741
Medial lemniscus (right)	-0.0453321	0.254727	0.0370335	0.328525	0.0142145	0.712223	0.0446884	0.249747	-0.000447355	0.989503
Middle cerebellar peduncle	-0.0318841	0.434373	0.00768423	0.849375	-0.0044178	0.91552	0.0110839	0.787808	0.0243403	0.534302
Pontine crossing tract	0.0150653	0.723679	-0.0118933	0.777415	-0.0263491	0.528471	-0.0253927	0.551684	0.00313044	0.939028
Posterior corona radiata (left)	-0.00767092	0.855939	0.0276698	0.468121	0.00550022	0.891021	0.0367072	0.358101	0.0213805	0.590693
Posterior corona radiata (right)	0.00510234	0.904451	-0.00228869	0.952169	0.0102822	0.795505	0.0190411	0.627523	0.0260143	0.48112
Posterior limb of internal capsule (left)	0.0186028	0.65588	0.046645	0.219947	-0.041963	0.290503	0.0107143	0.792143	-0.0490374	0.12769
Posterior limb of internal capsule (right)	-0.00323845	0.938947	0.0751847	0.0490062	-0.00175139	0.964634	0.09195	0.0289793	-0.0327107	0.297497
Posterior thalamic radiation (left)	0.0490921	0.222828	-0.0509415	0.20255	0.030772	0.450446	-0.0468781	0.243776	-0.0111726	0.777701
Posterior thalamic radiation (right)	-0.0348777	0.386075	-0.00124872	0.975462	0.00266002	0.9482	0.048645	0.234536	0.0422359	0.285162
Retrolenticular part of internal capsule (left)	-0.00554482	0.895114	0.0292753	0.47963	-0.0220451	0.587904	0.0347553	0.407075	-0.0112185	0.755642
Retrolenticular part of internal capsule (right)	-0.0292625	0.489841	0.0669587	0.102005	-0.0191367	0.633837	0.0570454	0.164554	-0.013856	0.700902
Sagittal stratum (left)	0.00307847	0.941047	-0.0159427	0.694118	0.00512125	0.900332	0.0170379	0.682361	0.00815795	0.833084
Sagittal stratum (right)	-0.0247213	0.55237	0.0356319	0.388235	-0.0115328	0.778119	0.0495076	0.219167	-0.0141606	0.72084
Splenium of corpus callosum	-0.0121443	0.770107	0.0217659	0.577914	0.0155413	0.698877	0.052458	0.200501	0.00565711	0.827289
Superior cerebellar peduncle (left)	-0.0247525	0.528865	0.0177918	0.661796	-0.093474	0.0182147	-0.0109063	0.79239	0.0040528	0.885342
Superior cerebellar peduncle (right)	-0.0564038	0.150529	0.0312351	0.448272	-0.0915127	0.0190334	0.00152335	0.970735	0.00339359	0.900523
Superior corona radiata (left)	-0.0185397	0.656139	0.039705	0.298398	-0.0551791	0.157238	0.0165904	0.680077	-0.0203409	0.606296
Superior corona radiata (right)	-0.0444088	0.28935	0.0567818	0.134036	-0.0386176	0.321541	0.0758354	0.0616954	0.0118485	0.764588
Superior fronto-occipital fasciculus (left)	-0.0278066	0.490846	0.0232616	0.536634	-0.0516544	0.176852	0.00171618	0.964663	0.00553169	0.891398
Superior fronto-occipital fasciculus (right)	-0.0469588	0.250818	0.0674495	0.067389	-0.0551751	0.141187	0.0177813	0.659004	-0.00836629	0.838406
Superior longitudinal fasciculus (left)	0.0154732	0.712706	0.0206257	0.606053	-0.00934255	0.817716	0.0422176	0.306853	-0.0562475	0.162192
Superior longitudinal fasciculus (right)	-0.0010346	0.980323	0.0523508	0.191637	-0.011833	0.771092	0.0882705	0.0265267	-0.0426927	0.268703
Tapetum (left)	0.0628348	0.137105	-0.0703454	0.0850838	0.0532868	0.186674	-0.0503066	0.226291	0.0363308	0.355483
Tapetum (right)	0.00846725	0.836915	-0.0157177	0.695805	0.0443288	0.26653	0.0081796	0.842723	0.0226548	0.547443
Uncinate fasciculus (left)	-0.00460968	0.913458	0.0587262	0.154729	-0.0282521	0.465086	0.0170348	0.648209	-0.020309	0.613467
Uncinate fasciculus (right)	-0.00593324	0.888693	0.0659746	0.103356	-0.030471	0.439864	0.00609996	0.873581	-0.0323426	0.424783

## Sheet: Table S5
Table S5. The Interaction Effects between T2DM and NOx
Fibers	FA		MD		ICVF		ISOVF		OD
	β	P	β	P	β	P	β	P	β	P
Anterior corona radiata (left)	-0.0422864	0.275422	0.0259937	0.501964	-0.0204068	0.591895	0.0460837	0.262998	0.0240153	0.523052
Anterior corona radiata (right)	-0.0282548	0.476556	0.0223633	0.559714	-0.0219571	0.564568	0.0268478	0.511266	0.00783654	0.841591
Anterior limb of internal capsule (left)	-0.0394932	0.331999	0.0129304	0.736497	0.0124878	0.74596	0.047676	0.230301	0.0234668	0.437692
Anterior limb of internal capsule (right)	-0.0220245	0.592337	0.0319773	0.403061	0.013178	0.730841	0.0659504	0.10535	0.0108207	0.716616
Body of corpus callosum	-0.0508421	0.211555	0.103256	0.00793001	0.00241706	0.952899	0.138725	0.000410005	0.00172206	0.940503
Cerebral peduncle (left)	-0.0328314	0.416166	-0.00112622	0.978167	-0.00614565	0.880893	0.0155801	0.711005	0.0329931	0.26535
Cerebral peduncle (right)	-0.032195	0.429597	0.0404514	0.322079	0.023897	0.5535	0.0614046	0.143161	0.00905164	0.76221
Cingulum cingulate gyrus (left)	-0.0238648	0.560173	0.0942668	0.0229578	-0.0298177	0.442321	0.0712676	0.09349	-0.0145924	0.603301
Cingulum cingulate gyrus (right)	-0.0505889	0.219118	0.116332	0.00493608	-0.0599326	0.119064	0.0633463	0.135183	0.00801498	0.803308
Cingulum hippocampus (left)	0.0186351	0.653184	-0.0607225	0.126983	0.0172487	0.647646	-0.0137644	0.701436	0.027963	0.483435
Cingulum hippocampus (right)	-0.0195929	0.637019	-0.00748731	0.853689	0.0245983	0.516562	0.0429719	0.242952	0.0506052	0.206003
Corticospinal tract (left)	-0.0219902	0.595547	0.0188149	0.659234	-0.0142588	0.731039	0.00945395	0.825209	0.00967642	0.806748
Corticospinal tract (right)	-0.0120541	0.766159	-0.0190376	0.651547	-0.0191166	0.644933	-0.0264134	0.535176	0.00351548	0.929287
External capsule (left)	0.00142612	0.971844	-0.029608	0.44051	0.0254188	0.484021	0.00196922	0.956933	0.0410665	0.255381
External capsule (right)	-0.039873	0.319489	0.025607	0.498098	0.0208592	0.566676	0.0500109	0.168022	0.0438455	0.218875
Fornix cres+stria terminalis (left)	-0.0407733	0.274645	-0.00117824	0.974385	0.000539403	0.989028	0.0102369	0.788584	0.0188061	0.612037
Fornix cres+stria terminalis (right)	-0.0412181	0.273998	0.0265784	0.473358	0.0122107	0.757929	0.0350245	0.363857	-0.00022918	0.994918
Fornix	-0.00882219	0.810709	0.00320778	0.931481	0.000796279	0.984457	0.0121887	0.735459	-0.0302348	0.456846
Genu of corpus callosum	-0.0878223	0.0251163	0.0853677	0.0262172	-0.0197081	0.620566	0.112366	0.00402276	0.0249536	0.223979
Inferior cerebellar peduncle (left)	-0.120582	0.00290862	0.0585676	0.11251	0.00654664	0.870432	0.0814907	0.0360359	0.105448	0.00536263
Inferior cerebellar peduncle (right)	-0.0817574	0.0414063	0.0489189	0.199463	-0.014209	0.721129	0.042587	0.284297	0.0619254	0.0926081
Medial lemniscus (left)	-0.0534844	0.18101	0.0639561	0.0918828	0.0182716	0.639582	0.0871299	0.0265531	0.0264689	0.446748
Medial lemniscus (right)	-0.0407854	0.302835	0.0186282	0.621123	0.0364451	0.34124	0.0459227	0.234207	0.0172178	0.610179
Middle cerebellar peduncle	-0.0323684	0.424744	-0.00879541	0.82691	0.00493054	0.90521	-0.00728161	0.858811	0.0455917	0.24155
Pontine crossing tract	-0.020849	0.622531	-0.00492979	0.906178	-0.00955147	0.818179	-0.0103617	0.806986	0.05186	0.202222
Posterior corona radiata (left)	-0.0535386	0.202208	0.0455789	0.228903	-0.00167554	0.966485	0.0758796	0.055704	0.0470376	0.233837
Posterior corona radiata (right)	-0.0314442	0.456726	0.0144697	0.703717	-0.00842043	0.830827	0.0479437	0.220967	0.0131531	0.720004
Posterior limb of internal capsule (left)	-0.00252078	0.951557	0.0296675	0.432509	-0.0124058	0.75321	0.018493	0.647241	-0.0300323	0.347953
Posterior limb of internal capsule (right)	-0.0273137	0.515707	0.0780167	0.0398786	0.0321746	0.412519	0.125287	0.00276271	-0.0136776	0.661138
Posterior thalamic radiation (left)	0.0409729	0.306017	-0.0283099	0.47613	0.0221458	0.584799	-0.014449	0.71778	-0.0290305	0.460601
Posterior thalamic radiation (right)	-0.0351836	0.378994	0.00990428	0.806046	0.00112294	0.977989	0.0649605	0.110293	0.0377194	0.33682
Retrolenticular part of internal capsule (left)	-0.0351029	0.401201	0.0340902	0.407621	-0.00805761	0.842082	0.053667	0.197773	0.0090956	0.799586
Retrolenticular part of internal capsule (right)	-0.0529783	0.208575	0.072221	0.0757724	-0.0112197	0.778735	0.0855893	0.0359403	-0.00322066	0.928417
Sagittal stratum (left)	-0.0126278	0.760254	-0.00817605	0.8391	0.00179835	0.964711	0.0185814	0.653477	0.015514	0.686732
Sagittal stratum (right)	-0.0382061	0.355595	0.0376547	0.359029	-0.0121292	0.765628	0.051168	0.201435	-0.0122834	0.755158
Splenium of corpus callosum	-0.0125513	0.761111	0.0159117	0.682101	0.0257741	0.518618	0.0537645	0.186653	0.00187571	0.94197
Superior cerebellar peduncle (left)	-0.028686	0.462786	-0.000422571	0.991661	-0.0822693	0.0365141	-0.0101518	0.805316	0.00981241	0.725379
Superior cerebellar peduncle (right)	-0.0468783	0.229231	0.0118849	0.771623	-0.0751291	0.0527716	-0.00498821	0.903808	0.0117616	0.662891
Superior corona radiata (left)	-0.0586103	0.15683	0.0507367	0.180828	-0.0536895	0.165826	0.0385208	0.335438	0.00544972	0.889503
Superior corona radiata (right)	-0.0694474	0.0955762	0.0821784	0.0290985	-0.054092	0.16234	0.0946089	0.0190382	0.0201525	0.60826
Superior fronto-occipital fasciculus (left)	-0.0223853	0.576794	0.00141636	0.969742	-0.031665	0.404415	-0.0160097	0.677226	-0.0284774	0.47937
Superior fronto-occipital fasciculus (right)	-0.0632201	0.11982	0.0747929	0.0408455	-0.0597664	0.108563	0.0498511	0.213333	-0.0181647	0.655934
Superior longitudinal fasciculus (left)	0.0193954	0.642457	0.0287564	0.469287	-0.00276657	0.945256	0.0629717	0.125115	-0.0489473	0.221043
Superior longitudinal fasciculus (right)	0.0128779	0.757459	0.0621116	0.118898	-0.00945907	0.814944	0.103816	0.00865297	-0.0617399	0.107484
Tapetum (left)	0.0543494	0.19576	-0.0648647	0.11001	0.0269684	0.501414	-0.0580389	0.160036	0.029974	0.443176
Tapetum (right)	0.000716827	0.986012	-0.0181275	0.650058	0.0306174	0.440005	-0.00104891	0.979579	0.0320351	0.392161
Uncinate fasciculus (left)	-0.011378	0.787262	0.0528456	0.197706	-0.0144454	0.70704	0.00252206	0.945779	-0.0192858	0.629357
Uncinate fasciculus (right)	-0.0240811	0.567708	0.0513826	0.201763	-0.0170782	0.663	0.000485757	0.989829	-0.012971	0.747373

## Sheet: Table S6
Table S6. The Interaction Effects between T2DM and PM10
Fibers	FA		MD		ICVF		ISOVF		OD
	β	P	β	P	β	P	β	P	β	P
Anterior corona radiata (left)	-0.0474481	0.201991	0.0869434	0.0191769	-0.076125	0.0371218	0.0529635	0.179176	-0.0384034	0.283118
Anterior corona radiata (right)	-0.0557434	0.142705	0.0819456	0.0268872	-0.0773482	0.034436	0.0492503	0.208677	-0.0165042	0.658543
Anterior limb of internal capsule (left)	-0.0920399	0.0180629	0.0831739	0.0240494	-0.0796727	0.0312869	0.051502	0.175103	-0.00907217	0.750545
Anterior limb of internal capsule (right)	-0.0631474	0.109181	0.0870545	0.0179485	-0.0804571	0.0284911	0.059283	0.128812	-0.0185688	0.509016
Body of corpus callosum	-0.0875446	0.0250111	0.120807	0.00120879	-0.0469991	0.230949	0.118659	0.00164269	0.020013	0.35517
Cerebral peduncle (left)	0.0288939	0.454163	-0.000901389	0.981726	-0.0701688	0.0740858	-0.0475976	0.237123	-0.0459717	0.100017
Cerebral peduncle (right)	0.0497651	0.201745	0.00688062	0.860171	-0.0390222	0.312197	-0.026845	0.503904	-0.0359728	0.202673
Cingulum cingulate gyrus (left)	-0.00522237	0.894002	0.125897	0.0015289	-0.0601452	0.106202	0.0598686	0.14106	-0.0480967	0.069134
Cingulum cingulate gyrus (right)	-0.0402563	0.30663	0.120213	0.00242998	-0.0897046	0.0149661	0.0209659	0.605383	-0.0104913	0.730016
Cingulum hippocampus (left)	0.0369176	0.351742	-0.057184	0.133031	-0.0149577	0.680148	-0.0477061	0.164126	-0.000874763	0.981659
Cingulum hippocampus (right)	0.0319459	0.421323	-0.0168108	0.66546	0.00254644	0.944232	-0.0382349	0.279082	-0.00611906	0.872742
Corticospinal tract (left)	0.0176211	0.656839	0.0301025	0.460958	-0.00187639	0.962336	0.0273163	0.505024	-0.0121725	0.747114
Corticospinal tract (right)	-0.00791441	0.838439	0.0331637	0.410919	-0.00716007	0.857277	0.0298591	0.463932	-0.0170354	0.652532
External capsule (left)	-0.0250567	0.517557	0.0444215	0.228353	-0.0481629	0.167804	0.0432132	0.212832	-0.02462	0.474284
External capsule (right)	-0.016109	0.674553	0.0399395	0.270307	-0.0286363	0.414346	0.0277228	0.422589	0.00318195	0.925131
Fornix cres+stria terminalis (left)	-0.0919989	0.00997674	0.0855801	0.014843	-0.036741	0.328546	0.0641201	0.0783957	0.0408451	0.248886
Fornix cres+stria terminalis (right)	-0.0918804	0.0109494	0.0994206	0.00508202	-0.0247314	0.514821	0.0875819	0.0176964	0.0252918	0.459969
Fornix	0.00722014	0.837974	-0.0163696	0.646886	-0.0299304	0.444406	-0.00886675	0.797529	-0.0398967	0.305138
Genu of corpus callosum	-0.116867	0.00181434	0.116145	0.00157426	-0.0655242	0.0860601	0.111741	0.00278278	0.0217068	0.257966
Inferior cerebellar peduncle (left)	-0.0630519	0.105027	0.042232	0.254364	0.0132487	0.730836	0.0620064	0.103699	0.0611234	0.0952483
Inferior cerebellar peduncle (right)	-0.0719697	0.0610282	0.0472066	0.216876	0.0195742	0.608293	0.0520101	0.179193	0.0602081	0.0887676
Medial lemniscus (left)	-0.0534976	0.163847	0.0917939	0.0120057	0.0109909	0.768961	0.0993412	0.00873522	-0.0211502	0.533702
Medial lemniscus (right)	-0.039989	0.292806	0.04145	0.253197	0.0142542	0.698197	0.0654221	0.0784692	0.00086373	0.978792
Middle cerebellar peduncle	-0.0369366	0.342772	0.0414829	0.295436	-0.00687856	0.862327	0.0456071	0.25148	0.0268649	0.474807
Pontine crossing tract	-0.0595624	0.142916	0.0313218	0.433849	-0.0144338	0.716877	0.0222224	0.584133	0.0914311	0.0187328
Posterior corona radiata (left)	-0.021537	0.592969	0.0411679	0.261217	-0.027548	0.472243	0.0149841	0.693566	-0.00203468	0.956999
Posterior corona radiata (right)	-0.0112324	0.781311	0.00188089	0.959011	-0.0146733	0.69821	-0.00543701	0.885308	-0.00975822	0.780544
Posterior limb of internal capsule (left)	0.0226405	0.568087	0.049535	0.169552	-0.0892222	0.0182861	-0.0224478	0.56099	-0.0594159	0.0494688
Posterior limb of internal capsule (right)	0.0343022	0.393553	0.0539479	0.138053	-0.0759998	0.0434137	0.00231687	0.953941	-0.0542654	0.065257
Posterior thalamic radiation (left)	0.0337407	0.379406	-0.0162427	0.670375	0.0092165	0.813218	-0.0157744	0.679756	-0.00755357	0.840456
Posterior thalamic radiation (right)	0.000798623	0.983389	0.00210183	0.956707	-0.00937199	0.810754	0.0176576	0.651236	-0.00588632	0.875197
Retrolenticular part of internal capsule (left)	-0.0312855	0.434047	0.0570658	0.147425	-0.0586422	0.130906	0.0333508	0.402967	-0.00698772	0.837051
Retrolenticular part of internal capsule (right)	-0.0197751	0.623794	0.0824623	0.0344328	-0.056299	0.141665	0.0587108	0.134109	-0.0600747	0.0777652
Sagittal stratum (left)	0.0159005	0.688064	0.0185008	0.632075	-0.0274819	0.482291	-0.0199627	0.614214	-0.0227802	0.534327
Sagittal stratum (right)	0.00421705	0.915166	0.0599197	0.127925	-0.0339088	0.385035	0.0485721	0.206615	-0.0816256	0.0298593
Splenium of corpus callosum	-0.0428575	0.280345	0.0445084	0.233442	-0.0232762	0.54316	0.0511692	0.191324	0.0208234	0.389502
Superior cerebellar peduncle (left)	-0.0260537	0.490294	0.012799	0.742138	-0.0564645	0.133581	-0.00643776	0.870185	-0.000788166	0.976929
Superior cerebellar peduncle (right)	-0.0338362	0.369914	0.00884154	0.823682	-0.0354965	0.340677	-0.00763934	0.848306	0.0255575	0.340924
Superior corona radiata (left)	-0.047167	0.233899	0.0876677	0.0162968	-0.0817573	0.0279357	0.0592501	0.122302	-0.0206661	0.580746
Superior corona radiata (right)	-0.0357238	0.370617	0.0803738	0.028405	-0.0695659	0.0621897	0.0591194	0.12688	-0.0336795	0.368916
Superior fronto-occipital fasciculus (left)	-0.00583027	0.879499	0.0694511	0.0520561	-0.0477492	0.189559	0.0723642	0.0490676	0.000610274	0.987332
Superior fronto-occipital fasciculus (right)	-0.0403173	0.300663	0.111545	0.00144258	-0.0915782	0.0103096	0.0789074	0.0395687	-0.02924	0.452619
Superior longitudinal fasciculus (left)	0.00641454	0.872572	0.047228	0.216596	-0.0421043	0.276563	0.0388991	0.322686	-0.0414284	0.277327
Superior longitudinal fasciculus (right)	-0.0141083	0.724214	0.0511988	0.183113	-0.0270432	0.486616	0.0724651	0.056898	-0.000842815	0.981586
Tapetum (left)	0.0143939	0.720651	-0.0235691	0.544411	-0.00255017	0.947219	-0.0264132	0.504258	0.0458875	0.218265
Tapetum (right)	-0.00463856	0.905723	-0.019948	0.602315	0.00382664	0.919954	-0.0131633	0.737273	0.0175259	0.622282
Uncinate fasciculus (left)	-0.000109242	0.997839	0.0634112	0.10644	-0.0431015	0.243914	0.0304367	0.389235	-0.0220169	0.56323
Uncinate fasciculus (right)	0.00887839	0.825746	0.0170529	0.657996	-0.0167808	0.656873	0.00419099	0.908256	0.0146275	0.703438

## Sheet: Table S7
Table S7. The Interaction Effects between T2DM and PM2.5
Fibers	FA		MD		ICVF		ISOVF		OD
	β	P	β	P	β	P	β	P	β	P
Anterior corona radiata (left)	-0.0709418	0.0709385	0.058027	0.138939	-0.0492608	0.201588	0.0603189	0.1475	0.0293463	0.437423
Anterior corona radiata (right)	-0.0547234	0.173125	0.0503905	0.197608	-0.0503985	0.191985	0.0374681	0.365233	0.0122738	0.755643
Anterior limb of internal capsule (left)	-0.068734	0.0946505	0.0340704	0.381685	0.00616206	0.874732	0.0647093	0.106806	0.0267681	0.374515
Anterior limb of internal capsule (right)	-0.0625022	0.13338	0.0535181	0.168485	0.00135926	0.97206	0.0931397	0.0238974	0.0198958	0.503009
Body of corpus callosum	-0.0746114	0.0706186	0.12565	0.00143965	-0.0269198	0.516001	0.142626	0.000340873	0.00384089	0.866565
Cerebral peduncle (left)	-0.038229	0.348496	-0.00910453	0.826631	-0.015698	0.705242	0.00960312	0.82137	0.0280511	0.342078
Cerebral peduncle (right)	-0.0594615	0.14871	0.0650185	0.115046	0.0247468	0.543993	0.0938911	0.0268964	0.0116096	0.697122
Cingulum cingulate gyrus (left)	-0.0160377	0.698484	0.117552	0.00510076	-0.04866	0.215979	0.0760388	0.0767715	-0.0312217	0.263912
Cingulum cingulate gyrus (right)	-0.0210993	0.612025	0.121579	0.00370244	-0.0687204	0.0776573	0.0555991	0.194616	-0.0273098	0.39499
Cingulum hippocampus (left)	0.0404224	0.334477	-0.0797008	0.0475684	0.0279009	0.466591	-0.031651	0.382325	0.0205331	0.609556
Cingulum hippocampus (right)	-0.0245243	0.558987	-0.000964191	0.98127	0.0225311	0.557889	0.0517344	0.165627	0.0514298	0.202619
Corticospinal tract (left)	-0.0258751	0.53694	0.0186018	0.666232	-0.0109889	0.793449	0.0154714	0.720754	0.0325648	0.414123
Corticospinal tract (right)	-0.019837	0.628523	0.00574735	0.892682	-0.0107024	0.799092	-0.00327234	0.939423	0.00896365	0.822536
External capsule (left)	-0.0109122	0.789638	-0.0225191	0.563286	-0.00134408	0.970927	-0.011473	0.754143	0.0306775	0.396873
External capsule (right)	-0.0411592	0.309799	0.0367725	0.337082	-0.00342939	0.926261	0.038551	0.291065	0.0297985	0.404813
Fornix cres+stria terminalis (left)	-0.0628148	0.0958408	0.0477683	0.198147	-0.0195724	0.622174	0.042292	0.271786	0.0128887	0.729587
Fornix cres+stria terminalis (right)	-0.0571355	0.13411	0.0522867	0.162991	-0.0146653	0.714626	0.0523607	0.179513	0.00612512	0.865502
Fornix	0.014232	0.702635	-0.0279261	0.458899	0.00807464	0.84506	-0.0182036	0.617938	-0.058165	0.156671
Genu of corpus callosum	-0.106279	0.0072481	0.0966486	0.0127904	-0.0463466	0.250422	0.110327	0.00518378	0.0337471	0.0959336
Inferior cerebellar peduncle (left)	-0.167567	4.523E-05*	0.0682252	0.0814779	0.00665073	0.870153	0.103487	0.0101944	0.146168	1.589E-04*
Inferior cerebellar peduncle (right)	-0.134251	0.000948729	0.0639378	0.113568	-0.00519517	0.897536	0.0655421	0.109535	0.11571	0.00197395
Medial lemniscus (left)	-0.0750362	0.0645302	0.0880331	0.0228526	0.00452298	0.908898	0.100134	0.0123595	0.0262218	0.465076
Medial lemniscus (right)	-0.0753664	0.0605424	0.0591926	0.122447	0.00439133	0.909974	0.0684502	0.081388	0.0170105	0.620851
Middle cerebellar peduncle	-0.074346	0.0706888	0.0237936	0.569983	0.00469934	0.910708	0.0332719	0.428366	0.0653974	0.0996329
Pontine crossing tract	-0.0226237	0.598397	0.00872322	0.836512	-0.0125792	0.764601	0.000746522	0.986109	0.0491489	0.231764
Posterior corona radiata (left)	-0.0831255	0.0508036	0.0751034	0.052314	-0.0296129	0.464474	0.0807905	0.0446082	0.0437806	0.272023
Posterior corona radiata (right)	-0.0606052	0.156217	0.0388812	0.313214	-0.0305855	0.444157	0.0537692	0.17576	0.0122676	0.740196
Posterior limb of internal capsule (left)	-0.0280766	0.502766	0.0418412	0.272078	-0.0181544	0.649466	0.0318419	0.435056	-0.0187136	0.558032
Posterior limb of internal capsule (right)	-0.0464979	0.27361	0.0803091	0.03662	0.0253181	0.524197	0.12537	0.00309299	-0.00563348	0.85623
Posterior thalamic radiation (left)	-0.00826215	0.838525	0.0205853	0.609478	-0.0199751	0.627765	0.0167574	0.678055	-0.0193246	0.625386
Posterior thalamic radiation (right)	-0.0780676	0.0539347	0.054676	0.181627	-0.0430536	0.297599	0.0794143	0.0542453	0.0384711	0.33077
Retrolenticular part of internal capsule (left)	-0.041439	0.32656	0.0568025	0.172294	-0.0356208	0.385141	0.054184	0.198377	-0.00333756	0.925907
Retrolenticular part of internal capsule (right)	-0.0772829	0.0695927	0.0990942	0.0161409	-0.045086	0.265229	0.0830301	0.0448796	-0.00916766	0.798897
Sagittal stratum (left)	-0.0126891	0.761679	0.0112402	0.783059	-0.0317649	0.44202	-0.00321239	0.938796	-0.0183588	0.635442
Sagittal stratum (right)	-0.0803943	0.0545455	0.0769354	0.064321	-0.0501745	0.223635	0.0492924	0.225132	0.00123866	0.975116
Splenium of corpus callosum	-0.0214036	0.609744	0.0127029	0.747479	0.00474389	0.906596	0.0317359	0.44299	0.0167796	0.51152
Superior cerebellar peduncle (left)	-0.0308431	0.439348	0.0203182	0.621117	-0.0859504	0.0306418	-0.000354842	0.993197	-0.00237868	0.934124
Superior cerebellar peduncle (right)	-0.0559969	0.159845	0.0468391	0.26395	-0.0530089	0.177963	0.0399837	0.343302	0.00822197	0.77173
Superior corona radiata (left)	-0.0950712	0.0231238	0.066477	0.0849108	-0.0714631	0.0688521	0.0644782	0.111468	0.020248	0.608436
Superior corona radiata (right)	-0.0906892	0.0314241	0.0815922	0.0351873	-0.0572969	0.14586	0.103783	0.0111953	0.0273978	0.488903
Superior fronto-occipital fasciculus (left)	-0.0580961	0.152622	0.0270351	0.474831	-0.0456471	0.235487	0.011716	0.763376	0.0209449	0.605917
Superior fronto-occipital fasciculus (right)	-0.0964937	0.0190023	0.082025	0.0268268	-0.0578336	0.125764	0.0658831	0.104104	0.0287232	0.484747
Superior longitudinal fasciculus (left)	-0.0150719	0.721291	0.0547304	0.175269	-0.0281119	0.491648	0.0796092	0.0554008	-0.0374634	0.352391
Superior longitudinal fasciculus (right)	-0.0377015	0.372089	0.0849014	0.0365794	-0.0368475	0.369377	0.112425	0.00516528	-0.0106098	0.783258
Tapetum (left)	0.0182097	0.668487	-0.0391291	0.340638	0.0105167	0.796086	-0.0338295	0.418042	0.0567199	0.149476
Tapetum (right)	-0.0336087	0.416576	0.0126553	0.754283	-0.00157746	0.968717	0.0173074	0.67626	0.0325565	0.386321
Uncinate fasciculus (left)	-0.0371884	0.382787	0.057966	0.162528	-0.0468721	0.230238	-0.00529841	0.887134	0.00611349	0.879234
Uncinate fasciculus (right)	-0.0404109	0.342823	0.0662291	0.103626	-0.0472724	0.236061	-0.00142178	0.970488	0.00642505	0.874219
Note: * Representative results can be corrected by multiple comparisons

## Sheet: Table S8
Table S8. The Interaction Effects between T2DM and PM2.5-10
Fibers	FA		MD		ICVF		ISOVF		OD
	β	P	β	P	β	P	β	P	β	P
Anterior corona radiata (left)	-0.0285762	0.416163	0.0621735	0.0763749	-0.0554253	0.108418	0.036251	0.330771	-0.0345571	0.306945
Anterior corona radiata (right)	-0.0431425	0.229989	0.0562758	0.107798	-0.0512799	0.138035	0.0508471	0.169751	0.00213197	0.951848
Anterior limb of internal capsule (left)	-0.0485846	0.186801	0.0597343	0.086435	-0.07416	0.0340009	0.016438	0.646992	-0.0210353	0.435525
Anterior limb of internal capsule (right)	-0.0169683	0.648876	0.0745591	0.0319728	-0.0620825	0.0738284	0.0525217	0.154524	-0.0348648	0.189683
Body of corpus callosum	-0.0399508	0.279181	0.0490979	0.164007	-0.01381	0.709648	0.0479211	0.178589	0.0325227	0.111932
Cerebral peduncle (left)	0.0652647	0.0735782	-0.0203612	0.584136	-0.0351531	0.343902	-0.0548643	0.149288	-0.0566434	0.0320434
Cerebral peduncle (right)	0.0778074	0.0346694	-0.017361	0.638196	-0.0188788	0.605011	-0.0435461	0.251261	-0.0430638	0.106673
Cingulum cingulate gyrus (left)	0.0312255	0.399224	0.091759	0.0145359	-0.0316779	0.368126	0.0452358	0.23929	-0.0542946	0.0299603
Cingulum cingulate gyrus (right)	-0.00848532	0.819638	0.0521323	0.164238	-0.060735	0.0814197	-0.0263258	0.492412	-0.0204419	0.476878
Cingulum hippocampus (left)	0.0587703	0.116758	-0.0553095	0.124219	-0.0267326	0.435733	-0.0756814	0.0195612	-0.0443039	0.218136
Cingulum hippocampus (right)	0.0618291	0.0996647	-0.0157526	0.668117	-0.00396549	0.908265	-0.0549801	0.0995715	-0.0579668	0.108565
Corticospinal tract (left)	0.053661	0.152274	0.0169977	0.659568	-0.0159525	0.671083	0.00810616	0.8342	-0.0420468	0.238708
Corticospinal tract (right)	0.0202804	0.580372	0.0282864	0.458009	-0.0033605	0.928856	0.0304863	0.428794	-0.036437	0.308301
External capsule (left)	0.00400591	0.912812	0.0407378	0.242406	-0.0427884	0.194886	0.0202593	0.536548	-0.0585201	0.07264
External capsule (right)	0.0327572	0.366214	0.00344474	0.919823	-0.0184952	0.577052	-0.00160736	0.960772	-0.0331608	0.300248
Fornix cres+stria terminalis (left)	-0.0559753	0.0971687	0.0739731	0.0258749	-0.0129177	0.716321	0.0549072	0.110751	0.0375928	0.262773
Fornix cres+stria terminalis (right)	-0.0740496	0.0300268	0.101867	0.00238369	-0.0115449	0.747732	0.0918359	0.00849232	0.0212436	0.511507
Fornix	-0.0420372	0.207733	0.0437937	0.194695	-0.078939	0.0328578	0.0427046	0.191046	0.0333426	0.3645
Genu of corpus callosum	-0.0496542	0.161222	0.0493633	0.155446	-0.0135561	0.707182	0.0544935	0.122974	0.0188524	0.298685
Inferior cerebellar peduncle (left)	0.0013538	0.970624	0.0311195	0.373859	0.00757226	0.835243	0.0376302	0.29583	0.0143281	0.679116
Inferior cerebellar peduncle (right)	-0.0223015	0.539211	0.0494751	0.170551	0.0266507	0.460423	0.0546692	0.135112	0.012244	0.714504
Medial lemniscus (left)	-7.01992e-05	0.998458	0.0538423	0.11933	0.00192989	0.956486	0.0537518	0.133716	-0.0596916	0.0632647
Medial lemniscus (right)	0.00745423	0.835689	0.0242771	0.479324	0.00609819	0.860698	0.0372448	0.289674	-0.0326327	0.288406
Middle cerebellar peduncle	0.00978054	0.790395	0.0380963	0.309213	-0.0288498	0.441532	0.0272613	0.468213	-0.037317	0.293703
Pontine crossing tract	-0.0419089	0.275407	0.0106563	0.778145	-0.0239007	0.524906	0.00175448	0.963531	0.0684225	0.062717
Posterior corona radiata (left)	0.0251257	0.509341	0.020848	0.546186	-0.0249256	0.49131	0.0151645	0.673019	-0.0606685	0.0889682
Posterior corona radiata (right)	0.0340508	0.373188	-0.00653892	0.849744	-0.0126506	0.723626	-0.00392244	0.912359	-0.0656472	0.0473853
Posterior limb of internal capsule (left)	0.0565506	0.131324	0.0370598	0.276853	-0.0795982	0.0259436	-0.0356022	0.32926	-0.0741368	0.00951124
Posterior limb of internal capsule (right)	0.0804723	0.034173	0.0261834	0.446432	-0.077006	0.0304006	-0.0329812	0.384326	-0.0680546	0.0144613
Posterior thalamic radiation (left)	0.0194555	0.591758	-0.0174492	0.62854	0.0146298	0.691494	0.00288018	0.936433	0.00797622	0.822031
Posterior thalamic radiation (right)	0.0287827	0.427181	-0.00246066	0.946375	-0.0002715	0.994144	0.0143174	0.698132	-0.027112	0.444126
Retrolenticular part of internal capsule (left)	0.00417835	0.911967	0.0384608	0.301582	-0.0510722	0.163914	0.014694	0.696617	-0.0262639	0.413554
Retrolenticular part of internal capsule (right)	0.0170503	0.654547	0.0602313	0.102125	-0.0488847	0.17707	0.0327762	0.37619	-0.0746176	0.0205049
Sagittal stratum (left)	0.0373069	0.318854	0.014222	0.696839	-0.00234304	0.949459	0.0183159	0.624588	-0.0435256	0.209151
Sagittal stratum (right)	0.0502087	0.179556	0.0320272	0.389235	0.00516434	0.888703	0.0733003	0.0437221	-0.0943822	0.00789501
Splenium of corpus callosum	-0.0077787	0.835832	0.0151478	0.668006	0.000324505	0.992846	0.0300337	0.41714	0.0192633	0.39975
Superior cerebellar peduncle (left)	-0.00504526	0.887615	0.0254338	0.489102	-0.0234991	0.509111	0.0105783	0.776311	-0.0123033	0.632998
Superior cerebellar peduncle (right)	-0.0107548	0.763091	0.0277518	0.459465	-0.0123859	0.72512	0.0182001	0.629738	0.000978028	0.969248
Superior corona radiata (left)	0.00229889	0.95105	0.0748003	0.0301245	-0.069661	0.0475816	0.0360651	0.319658	-0.0508965	0.150189
Superior corona radiata (right)	0.00622003	0.868992	0.0728692	0.035519	-0.0649468	0.0655053	0.0406138	0.267196	-0.0666896	0.0598225
Superior fronto-occipital fasciculus (left)	-0.0128001	0.724692	0.0669116	0.0477121	-0.0563068	0.10169	0.0613754	0.0774155	0.0186332	0.608085
Superior fronto-occipital fasciculus (right)	-0.0275172	0.454792	0.102554	0.00193172	-0.090246	0.00746846	0.0621787	0.0859857	-0.0280362	0.446201
Superior longitudinal fasciculus (left)	-0.000984989	0.979209	0.0446014	0.216929	-0.0426552	0.243449	0.0349023	0.34779	-0.0311053	0.388246
Superior longitudinal fasciculus (right)	-0.000734928	0.984483	0.0406309	0.263619	-0.0236945	0.519055	0.0528324	0.14186	-0.00996652	0.772801
Tapetum (left)	0.0108347	0.775781	0.00260476	0.943491	-0.0208163	0.567492	-0.00335194	0.928544	0.0120647	0.731976
Tapetum (right)	0.0280035	0.449302	-0.0206208	0.5687	-0.00181443	0.959789	-0.0162472	0.661289	-0.0232836	0.488625
Uncinate fasciculus (left)	0.0458901	0.228643	0.0316092	0.394441	-0.00904215	0.795955	0.0334254	0.316841	-0.0468522	0.193178
Uncinate fasciculus (right)	0.0226415	0.552451	0.00262765	0.942466	-0.0152711	0.668939	-0.0269505	0.433351	-0.00382137	0.916217

## Sheet: Table S9
Table S9. The Main Effects of NO2
Fibers	FA		MD		ICVF		ISOVF		OD
	β	P	β	P	β	P	β	P	β	P
Anterior corona radiata (left)	-0.0147252	0.0723255	0.0164748	0.0440474	-0.0155198	0.0536236	0.00108663	0.900455	-0.000387981	0.960839
Anterior corona radiata (right)	-0.0110261	0.188452	0.0114975	0.156193	-0.013957	0.0830747	-0.00381109	0.658579	-0.00154255	0.851394
Anterior limb of internal capsule (left)	-0.0106351	0.215793	0.0109828	0.17564	-0.0126647	0.119553	0.00175051	0.834698	-0.00251486	0.692401
Anterior limb of internal capsule (right)	-0.00446013	0.607384	0.00690622	0.392316	-0.012909	0.110457	-0.00128093	0.881496	-0.00320053	0.6096
Body of corpus callosum	-0.0111011	0.197001	0.0104433	0.204071	-0.00384143	0.656398	0.00893731	0.281698	0.00503214	0.299681
Cerebral peduncle (left)	-0.00461506	0.58841	-0.00492867	0.570298	0.000432646	0.960133	-0.00984021	0.267545	0.00049835	0.936222
Cerebral peduncle (right)	-0.0101968	0.236272	-0.00156657	0.85575	-0.00103235	0.903467	-0.00294124	0.73965	0.00567354	0.367112
Cingulum cingulate gyrus (left)	-0.00543406	0.529867	-0.00198416	0.820572	-0.00392307	0.632347	-0.000374555	0.966678	0.00971661	0.0999413
Cingulum cingulate gyrus (right)	-0.0100371	0.248391	-0.00652247	0.455135	7.59423e-05	0.99254	-0.00317041	0.723085	0.0141466	0.0365318
Cingulum hippocampus (left)	0.0093141	0.28708	0.00154589	0.853913	0.00268606	0.73587	0.00899377	0.23529	-0.00849027	0.311106
Cingulum hippocampus (right)	0.0102409	0.242381	0.00299822	0.726393	0.00244972	0.759445	0.00615316	0.428465	-0.014273	0.089595
Corticospinal tract (left)	0.00761903	0.38334	-0.00903218	0.315635	0.00822452	0.347244	-0.00883799	0.327727	-0.00263495	0.751122
Corticospinal tract (right)	-0.00779203	0.362258	-0.000114072	0.989772	0.00619908	0.478857	8.99913e-05	0.992014	0.00832375	0.317227
External capsule (left)	-0.010885	0.202021	0.0151493	0.0616836	-0.0148768	0.0525384	0.0106261	0.167349	0.00193624	0.798562
External capsule (right)	-0.014054	0.0965664	0.0173603	0.0295362	-0.0120237	0.117958	0.00976879	0.202015	0.00294415	0.694328
Fornix cres+stria terminalis (left)	-0.0188865	0.0169045	0.0205667	0.00803112	-0.00924252	0.26405	0.0199443	0.0134681	0.00859382	0.270653
Fornix cres+stria terminalis (right)	-0.0236349	0.00303239	0.0259591	0.000928612	-0.00918769	0.271739	0.0229635	0.00486995	0.01099	0.146789
Fornix	-0.0166857	0.0323335	0.0166348	0.0348458	-0.00952171	0.270723	0.0167731	0.0278192	0.00874826	0.305432
Genu of corpus callosum	-0.0127085	0.125247	0.0149095	0.0661738	-0.00587339	0.484726	0.0149159	0.0707596	0.00206062	0.633347
Inferior cerebellar peduncle (left)	-0.0101244	0.236791	0.00613567	0.431115	0.000110923	0.98955	0.00498911	0.543383	0.0162133	0.041884
Inferior cerebellar peduncle (right)	-0.00910184	0.281546	0.0138332	0.0856814	-0.00473049	0.573292	0.00862646	0.304478	0.0145497	0.0598933
Medial lemniscus (left)	-0.00292786	0.728618	-0.00808453	0.311065	0.00473547	0.565105	-0.00671916	0.417452	0.0124224	0.0894269
Medial lemniscus (right)	-0.00698902	0.402845	-0.00013281	0.986673	0.00278746	0.730135	-0.0018035	0.824775	0.00778553	0.271345
Middle cerebellar peduncle	-0.0038874	0.649591	-6.50546e-05	0.993885	0.00568508	0.515203	-0.00121784	0.887898	0.0074479	0.362547
Pontine crossing tract	0.0138648	0.120795	-0.0134315	0.128222	0.00742975	0.396794	-0.012833	0.151877	-0.00772309	0.365903
Posterior corona radiata (left)	-0.00487902	0.582054	0.0153442	0.0549398	-0.0176105	0.0365636	0.00442298	0.597735	-0.0174214	0.0357353
Posterior corona radiata (right)	-0.00711931	0.424527	0.0177617	0.0257644	-0.0176137	0.0343356	0.00712713	0.385337	-0.0104792	0.173901
Posterior limb of internal capsule (left)	0.000840317	0.923543	0.0139463	0.0804618	-0.00494407	0.553028	0.00636376	0.455522	-0.0105483	0.11669
Posterior limb of internal capsule (right)	-0.00139074	0.875397	0.00416421	0.603187	-0.0105934	0.201258	-0.00918215	0.298533	-0.00883272	0.178178
Posterior thalamic radiation (left)	-0.0235761	0.00532243	0.0246031	0.00335189	-0.0249857	0.00349482	0.0085761	0.30937	0.00695083	0.401934
Posterior thalamic radiation (right)	-0.0277148	0.00105047	0.0201784	0.017679	-0.0193673	0.024168	0.00760127	0.375883	0.020325	0.0140634
Retrolenticular part of internal capsule (left)	0.00315558	0.720669	0.0115092	0.185203	-0.014307	0.0938371	-0.00205054	0.815611	-0.00461501	0.540416
Retrolenticular part of internal capsule (right)	0.00817117	0.357947	0.0112262	0.190728	-0.0173993	0.0390214	-0.00577634	0.50231	-0.0159679	0.034295
Sagittal stratum (left)	-0.0182681	0.0367724	0.0195905	0.0211593	-0.0148089	0.0845533	0.0161451	0.0645074	0.013165	0.104051
Sagittal stratum (right)	-0.0083467	0.339476	0.0135265	0.118395	-0.0128958	0.133195	0.00593555	0.482481	0.00469067	0.571706
Splenium of corpus callosum	-0.00392073	0.652693	0.0173599	0.0343413	-0.0189697	0.0244786	0.000181526	0.983147	-0.0100796	0.0625653
Superior cerebellar peduncle (left)	-0.0333688	5.513E-05*	0.0166157	0.0516534	-0.0141436	0.0886929	0.0127378	0.142981	0.0234332	6.970E-05*
Superior cerebellar peduncle (right)	-0.0309328	1.807E-04*	0.0276448	0.00138855	-0.0112306	0.170254	0.024615	0.00474634	0.0149495	0.00864782
Superior corona radiata (left)	-0.000248576	0.977293	0.0136588	0.0880433	-0.0139357	0.0887313	0.00178656	0.832324	-0.00974432	0.237084
Superior corona radiata (right)	0.00372653	0.671633	0.0069662	0.381473	-0.00961925	0.239763	-0.00248343	0.770493	-0.0107612	0.192674
Superior fronto-occipital fasciculus (left)	-0.0186161	0.0281922	0.0175467	0.0261972	-0.0180324	0.0247999	0.013582	0.0943128	0.00545717	0.518784
Superior fronto-occipital fasciculus (right)	-0.0233418	0.00661371	0.0135926	0.0789482	-0.0191006	0.0154066	0.00744792	0.378017	0.0105554	0.217717
Superior longitudinal fasciculus (left)	-0.0116275	0.187144	0.0145324	0.0833231	-0.0128105	0.132053	0.00831337	0.337415	0.00487096	0.562106
Superior longitudinal fasciculus (right)	-0.00736426	0.402657	0.011442	0.173806	-0.0139528	0.101998	-0.000991793	0.905411	-6.48291e-06	0.999358
Tapetum (left)	-0.00972945	0.272441	0.0255399	0.00291132	-0.0192692	0.0228783	0.0204438	0.0191912	-0.0114026	0.165433
Tapetum (right)	-0.0208306	0.0157748	0.0241629	0.00417624	-0.0148	0.0770424	0.0210915	0.0147327	0.00724193	0.357145
Uncinate fasciculus (left)	0.0040262	0.65092	-0.000613053	0.943543	-0.00457879	0.57257	-0.00633954	0.417142	-0.00455142	0.587691
Uncinate fasciculus (right)	0.00678563	0.445467	0.000120174	0.988707	-0.00234974	0.77632	2.26787e-05	0.997746	-0.00612954	0.46872
Note: * Representative results can be corrected by multiple comparisons

## Sheet: Table S10
Table S10. The Main Effects of NOx
Fibers	FA		MD		ICVF		ISOVF		OD
	β	P	β	P	β	P	β	P	β	P
Anterior corona radiata (left)	-0.0168459	0.0447925	0.0154991	0.0643579	-0.0141373	0.0862059	0.00241835	0.785825	0.0021972	0.786367
Anterior corona radiata (right)	-0.0144133	0.0933595	0.0122	0.141789	-0.0126255	0.125967	-0.000191472	0.982713	0.00161318	0.848598
Anterior limb of internal capsule (left)	-0.018649	0.0341179	0.0165902	0.0459281	-0.0159891	0.0550711	0.00657078	0.444769	-0.00179148	0.783641
Anterior limb of internal capsule (right)	-0.00901892	0.310494	0.0107421	0.194092	-0.017439	0.0353471	0.000760367	0.931181	-0.00317528	0.621557
Body of corpus callosum	-0.0121533	0.167927	0.01355	0.10762	-0.00277734	0.753599	0.011971	0.1591	0.00376235	0.449874
Cerebral peduncle (left)	-0.0150459	0.0850761	0.00303873	0.732679	0.00305358	0.730634	0.00149476	0.869437	0.00527259	0.409351
Cerebral peduncle (right)	-0.0185988	0.0349897	0.00272139	0.757944	-0.000588782	0.946182	0.00334283	0.712413	0.00956972	0.13823
Cingulum cingulate gyrus (left)	-0.00762388	0.389701	-0.0036995	0.679777	-0.00423306	0.614409	-0.00365786	0.690499	0.0100855	0.0961576
Cingulum cingulate gyrus (right)	-0.00905948	0.30913	-0.00712409	0.425962	-0.000378462	0.963728	-0.00528058	0.564583	0.0129992	0.0611932
Cingulum hippocampus (left)	0.00870133	0.331756	0.0020181	0.814517	0.00156013	0.848367	0.0102443	0.186998	-0.00938617	0.275238
Cingulum hippocampus (right)	0.0139303	0.120649	0.000673265	0.938868	0.00390837	0.633558	0.00715734	0.368711	-0.0164172	0.0570849
Corticospinal tract (left)	0.0050006	0.576537	-0.00627413	0.496344	0.0087644	0.328397	-0.00561455	0.544018	-0.000123898	0.988406
Corticospinal tract (right)	-0.0124264	0.156071	0.00194784	0.830825	0.00872516	0.33054	0.00419495	0.648829	0.0121771	0.153892
External capsule (left)	-0.0188835	0.0307718	0.0182451	0.0280595	-0.0178973	0.0228536	0.0101334	0.198736	0.00672927	0.387487
External capsule (right)	-0.02097	0.0155224	0.0198048	0.0153889	-0.014622	0.0635497	0.0118512	0.13089	0.00613839	0.424637
Fornix cres+stria terminalis (left)	-0.0222758	0.00596162	0.0198843	0.0123665	-0.0108326	0.201484	0.0182576	0.0272546	0.0132813	0.0971687
Fornix cres+stria terminalis (right)	-0.0265831	0.00113722	0.0244121	0.00237148	-0.00842735	0.325198	0.0210598	0.0117208	0.0161287	0.037984
Fornix	-0.0171541	0.0317368	0.0176499	0.0288741	-0.0129634	0.143322	0.0158795	0.0420822	0.011491	0.189564
Genu of corpus callosum	-0.0107387	0.206092	0.0128396	0.122517	-0.00152136	0.859796	0.0150826	0.0744784	0.00169451	0.702273
Inferior cerebellar peduncle (left)	-0.0158485	0.070624	0.00810711	0.309356	-0.00139923	0.871878	0.00712723	0.396208	0.0192167	0.0187178
Inferior cerebellar peduncle (right)	-0.0122577	0.156923	0.00989233	0.229781	-0.00799834	0.352677	0.00271332	0.752293	0.0157042	0.0477366
Medial lemniscus (left)	-0.00743077	0.390017	-0.00874224	0.28494	0.00179478	0.831516	-0.00672294	0.428348	0.0164605	0.028264
Medial lemniscus (right)	-0.0106358	0.213978	-0.0011969	0.883175	-0.00199244	0.809826	-0.00433216	0.603585	0.0122607	0.0913972
Middle cerebellar peduncle	-0.00586092	0.503821	-5.95759e-05	0.994534	0.00366415	0.6823	-0.00165164	0.851967	0.0110834	0.186711
Pontine crossing tract	0.00980306	0.284238	-0.00874799	0.333572	0.00534682	0.551779	-0.00879542	0.337813	-0.00773771	0.377312
Posterior corona radiata (left)	-0.007965	0.380268	0.0178747	0.0289521	-0.0175363	0.0420322	0.00574228	0.503225	-0.0135371	0.11184
Posterior corona radiata (right)	-0.00983713	0.281439	0.0190696	0.0193622	-0.0185389	0.0296588	0.00918777	0.27453	-0.00892764	0.258905
Posterior limb of internal capsule (left)	-0.00802306	0.371065	0.0181253	0.0265878	-0.00934049	0.274073	0.0108808	0.212981	-0.00665886	0.334566
Posterior limb of internal capsule (right)	-0.00713176	0.432463	0.00853993	0.298178	-0.0142006	0.0946017	-0.0046382	0.608325	-0.00715329	0.287964
Posterior thalamic radiation (left)	-0.0264185	0.00230136	0.0251236	0.00344978	-0.0258008	0.00324512	0.00844807	0.328371	0.00825974	0.331904
Posterior thalamic radiation (right)	-0.0304263	0.000445254	0.020919	0.016363	-0.0219915	0.0124744	0.00452897	0.606619	0.0220174	0.00953748
Retrolenticular part of internal capsule (left)	-0.00226563	0.802184	0.0111248	0.211323	-0.0166268	0.0573969	-0.00374678	0.677486	-0.000913399	0.906011
Retrolenticular part of internal capsule (right)	0.00233204	0.797932	0.0137076	0.118934	-0.0186248	0.0310904	-0.00295948	0.737308	-0.0135837	0.0793082
Sagittal stratum (left)	-0.0201148	0.0248263	0.0186813	0.0318775	-0.0164192	0.061957	0.0109007	0.223159	0.012507	0.13235
Sagittal stratum (right)	-0.0119516	0.181932	0.0149324	0.092482	-0.0122466	0.164008	0.00889343	0.30442	0.00563328	0.508143
Splenium of corpus callosum	-0.00398161	0.655524	0.0193796	0.0210798	-0.0177297	0.0401784	0.00436672	0.619832	-0.0111629	0.0444521
Superior cerebellar peduncle (left)	-0.0406265	1.647E-06*	0.0217719	0.012822	-0.020014	0.0187169	0.0171634	0.0540535	0.0262037	1.466E-05*
Superior cerebellar peduncle (right)	-0.0370165	1.219E-05*	0.0325289	2.412E-04*	-0.0166488	0.0472598	0.0278088	0.00184651	0.0174307	0.00284993
Superior corona radiata (left)	-0.0066398	0.458124	0.0153802	0.0607412	-0.018027	0.031616	-0.000505752	0.953346	-0.00728235	0.389218
Superior corona radiata (right)	-0.00221981	0.805345	0.0107433	0.187473	-0.0127655	0.127755	-0.000116039	0.989385	-0.00772783	0.361916
Superior fronto-occipital fasciculus (left)	-0.0241927	0.00536618	0.0220734	0.00629968	-0.0209991	0.0107114	0.0161299	0.0524167	0.00400809	0.644187
Superior fronto-occipital fasciculus (right)	-0.0255541	0.00370458	0.0165768	0.0363863	-0.022383	0.00556995	0.0105274	0.22391	0.0110546	0.208415
Superior longitudinal fasciculus (left)	-0.0148167	0.100925	0.016107	0.0608649	-0.0146776	0.0921365	0.0085822	0.333667	0.0063467	0.461733
Superior longitudinal fasciculus (right)	-0.0129641	0.150453	0.0138994	0.106594	-0.0176381	0.0436121	-0.00321412	0.706938	0.00226203	0.784355
Tapetum (left)	-0.0115585	0.203125	0.028648	0.00111299	-0.0168618	0.0519651	0.0246517	0.00583353	-0.0124671	0.139801
Tapetum (right)	-0.0265862	0.00263453	0.027936	0.00122588	-0.0180843	0.0349435	0.0238684	0.00705884	0.0101677	0.207861
Uncinate fasciculus (left)	-0.0066043	0.4688	0.0038063	0.667841	-0.00953168	0.251601	-0.00625649	0.434485	0.00451429	0.600285
Uncinate fasciculus (right)	-0.00516098	0.571115	0.00198938	0.819112	-0.007503	0.375923	-0.00221216	0.788013	0.00561542	0.517715
Note: * Representative results can be corrected by multiple comparisons

[truncated: 3 more sheets: Table S11, Table S12, Table S13]
